# Supplementary material for: Identification of suitable internal control genes for expression studies in Coffea arabica under different experimental conditions
Source: Springer Nature journal article supplement (doi:10.1186/1471-2199-10-1), 2009-01-01

**Stability Value**

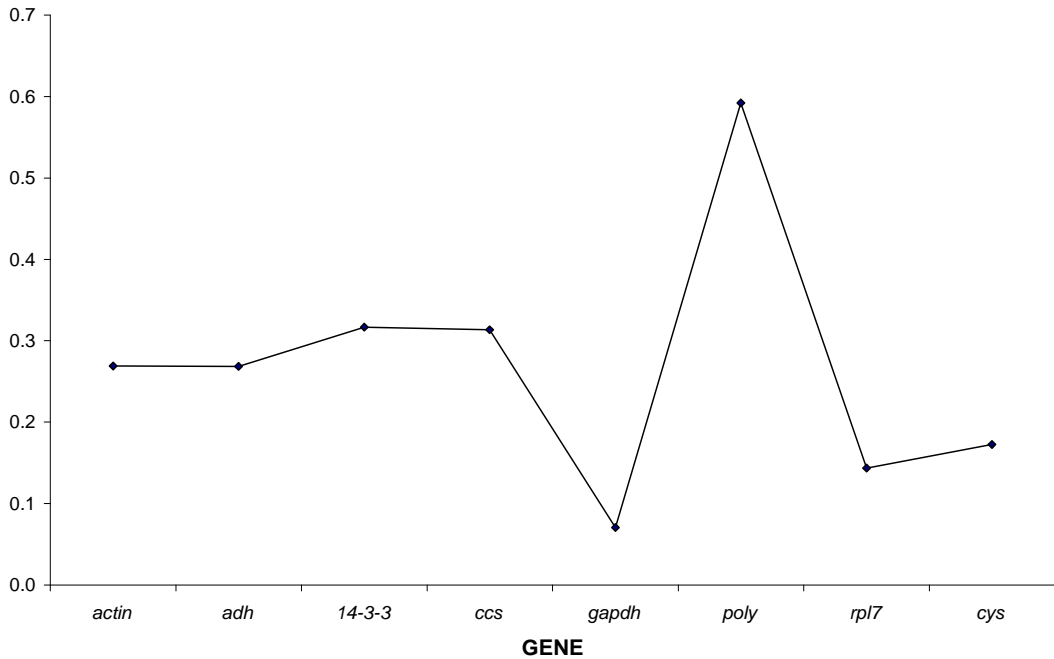

Supplement: 12867_2008_369_MOESM3_ESM.pdf [file 12867_2008_369_MOESM3_ESM.pdf]
